1 **Title:**

2 Length–length and length–weight relationships for four small pelagic fishes in the Kuroshio–  
3 Oyashio current system

4

5 **Running title:**

6 Morphometric relationships of small pelagic fishes

7

8 **Authors:**

9 Sho Furuichi<sup>1\*</sup>, Yasuhiro Kamimura<sup>1</sup>, Ryuji Yukami<sup>1</sup>

10

11 **Affiliations:**

12 <sup>1</sup>Fisheries Resources Institute, Japan Fisheries Research and Education Agency, Yokohama,  
13 Japan

14

15 **\*Correspondence:**

16 Sho Furuichi, Fisheries Resources Institute, Japan Fisheries Research and Education Agency,  
17 Yokohama, Japan

18 Email: [sfuru@affrc.go.jp](mailto:sfuru@affrc.go.jp)

19

20

21 **Summary**

22 Length–length relationships and length–weight relationships were estimated for four small  
23 pelagic fishes (Japanese sardine *Sardinops melanostictus*, Japanese anchovy *Engraulis*  
24 *japonicus*, chub mackerel *Scomber japonicus*, and spotted mackerel *Scomber australasicus*)  
25 in the Kuroshio–Oyashio current system. Fish samples were collected from surface–midwater  
26 trawl surveys and commercial purse-seine fisheries between September and October of 2020  
27 in the western North Pacific. Total length (TL), fork length (FL), and standard length (SL)  
28 were measured to 0.01 cm, and whole body weight (W) was measured to the nearest 0.01 g  
29 for each individual. All length–length relationships (TL–FL, TL–SL, and FL–SL) were highly  
30 significant ( $p < 0.0001$ ), with  $r^2 > 0.98$  in all species. Length–weight relationships (W–TL,  
31 W–FL, and W–SL) were also highly significant ( $p < 0.0001$ ), with  $r^2 > 0.98$  in all species.  
32 This study provides a useful reference for biological studies and stock assessments of these  
33 small pelagic fishes.

34

## 35 1. INTRODUCTION

36 Length–length relationships (LLRs) and length–weight relationships (LWRs) of fishes are key  
37 tools in fish biology and ecology, fisheries science, and fisheries management (Froese, 2006;  
38 Froese et al., 2011). Length–length relationships are needed to convert length measurements  
39 from one length type into another and are also important in comparative growth studies.  
40 Length–weight relationships are used to predict weight from length and to calculate  
41 production and biomass of a fish population in stock assessment.

42 In the Kuroshio–Oyashio current system (around the Japanese Archipelago), the small  
43 pelagic fish community is dominated by Japanese sardine *Sardinops melanostictus* Temminck  
44 & Schlegel, 1844, Japanese anchovy *Engraulis japonicus* Temminck & Schlegel, 1846, chub  
45 mackerel *Scomber japonicus* Houttuyn, 1782, and spotted mackerel *Scomber australasicus*  
46 Cuvier, 1832. The ecological and commercial importance and remarkable fluctuations in the  
47 abundances of these small pelagic fishes have inspired studies ranging in scope from the  
48 dynamics of single stocks to the dynamics of small pelagic fish communities at ecosystem and  
49 global scales (Chavez, 2003; Oozeki et al., 2019). Although numerous researchers from  
50 different institutions and disciplines have studied the same ecosystem, and even the same fish  
51 stocks, these researchers have often used different standards for fish length measurement (i.e.,  
52 standard length [SL], fork length [FL], or total length [TL]) (e.g., Jung et al., 2008; Kang et  
53 al., 2009; Yukami et al., 2008). Therefore, conversion equations (that is, LLRs) for these  
54 various length measurement standards are required for comparative or integrative research  
55 among different geographic regions and species. However, there is currently little information  
56 on LLRs for the four small pelagic fishes in the Kuroshio–Oyashio current system. In  
57 addition, although LWRs for these fishes have been reported, studies have been limited to  
58 specific geographic regions and length-measurement standards.

59 In this study, we provide LLRs and LWRs among TL, FL, and SL for the four small

60 pelagic fish species (*S. melanostictus*, *E. japonicus*, *S. japonicus*, and *S. australasicus*) that  
61 dominate the Kuroshio–Oyashio current system.

62

63

## 64 2. MATERIALS AND METHODS

65 Specimens were obtained from a trawl survey and from commercial purse-seine catches. In  
66 the trawl survey, 35 surface–midwater trawls were conducted in the western North Pacific off  
67 northern Japan and the Kuril Islands (38°20'N–46°58'N, 142°8'E–174°50'E) during  
68 September–October 2020. A surface–midwater trawl net (opening dimensions: 30 m × 30 m;  
69 cod-end mesh size: 17.5 mm) was towed once at each station (15–60 min duration at 3.5–5.0  
70 kn [1.8–2.6 m/s], depths < 30–40 m). At each station, fish species were identified on board,  
71 and up to 380 individuals of each species were randomly selected and stored at –25 °C.

72 Samples from purse-seine catches were collected from commercial landings at the Hachinohe  
73 Port (an important fishing port in northern Japan) in October 2020. All sampled fish were  
74 measured to the nearest 0.01 cm in standard length (SL), fork length (FL), and total length  
75 (TL) in the laboratory. Total weight was measured to the nearest 0.01 g.

76 To estimate LLRs, linear relationships between the various measurement types (TL, FL,  
77 and SL in cm) were derived by using major-axis (MA) regression. MA regression is used to  
78 find the axis that minimizes errors in both measured variables, and is particularly useful for  
79 comparative and integrative study as it allows bi-directional conversions.

80 LWRs were estimated by using the equation:  $W = a \times L^b$ , where  $W$  is total body  
81 weight (g),  $L$  is length (TL, FL, or SL in cm),  $a$  is the coefficient of proportionality, and  $b$  is  
82 the coefficient of allometry. Parameters  $a$  and  $b$  were estimated by non-linear least-squares  
83 regression. Additionally, 95% confidence intervals of  $a$  and  $b$ , and the coefficient of  
84 determination ( $r^2$ ) were calculated. All statistical analyses were performed in R version 3.6.3

85 (R Development Core Team, 2020).

86

87

### 88 **3. RESULTS**

89 Sample sizes, body-length and body-weight ranges, and estimated LWR and LLR parameters  
90 for each fish species are presented in Tables 1, 2, and 3. All LLRs were highly significant ( $p <$   
91  $0.0001$ ), with  $r^2$  values  $>0.98$ . All LWRs were also highly significant ( $p < 0.0001$ ), with  $r^2$   
92 values  $>0.94$ .

93

94

### 95 **4. DISCUSSION**

96 In the present study, we estimated LLRs for *S. melanostictus*, *E. japonicus*, *S. japonicus*, and  
97 *S. australasicus*. This is the first comprehensive report of LLRs for these four small pelagic  
98 fish species in the Kuroshio–Oyashio current system. Although these species have been  
99 studied in various parts of the world, previous studies employed a variety of standards for fish  
100 length measurements, making comparisons between and among studies difficult. Our results  
101 will be helpful for comparative or integrative research among different geographic regions  
102 and species.

103 In addition to LLRs, we also estimated LWRs for the four species. The allometric  
104 coefficients ( $b$ ) of the LWRs were within the expected range of 2.5–3.5 (Froese, 2006),  
105 although there was some variability among species. This indicates that our estimates are  
106 plausible. However, we were not able to sample specimens from across a broad temporal and  
107 spatial range. LWRs can be affected by various factors such as season and location (Jellyman  
108 et al., 2013; Valle et al., 2020). Therefore, a broader sampling scheme in future studies could  
109 provide more robust LWRs.

110           In conclusion, our results provide new information on LLRs and LWRs for four small  
111 pelagic fish species in the Kuroshio–Oyashio current system. These data will be useful for  
112 further biological study and management of the four species.

113

114

115

116 **ACKNOWLEDGEMENTS**

117 We are very grateful to Michiyo Ichikawa, Aki Narisawa, Akiko Sugawara, Yuko Saiki, and  
118 Tomiko Nagai, who greatly contributed to the data collection. We thank all those who helped  
119 in the collection of samples. We also thank English-speaking professional editors from ELSS,  
120 Inc., for English proofreading. Funding for this study was provided by the Japan Fisheries  
121 Research and Education Agency and the Fisheries Agency of Japan.

122

123 **CONFLICTS OF INTEREST**

124 The authors declare no conflicts of interest.

125

126 **DATA AVAILABILITY STATEMENT**

127 The data used to support the findings of this study are available from the corresponding  
128 author upon request.

129

130

131

132 **REFERENCES**

- 133 Chavez, F. P. (2003). From Anchovies to Sardines and Back: Multidecadal Change in the  
134 Pacific Ocean. *Science*, 299(5604), 217–221. <https://doi.org/10.1126/science.1075880>
- 135 Froese, R. (2006). Cube law, condition factor and weight-length relationships: History, meta-  
136 analysis and recommendations. *Journal of Applied Ichthyology*, 22(4), 241–253.  
137 <https://doi.org/10.1111/j.1439-0426.2006.00805.x>
- 138 Froese, R., Tsikliras, A. C., & Stergiou, K. I. (2011). Editorial note on weight-length relations  
139 of fishes. *Acta Ichthyologica et Piscatoria*, 41(4), 261–263.  
140 <https://doi.org/10.3750/AIP2011.41.4.01>
- 141 Jellyman, P. G., Booker, D. J., Crow, S. K., Bonnett, M. L., & Jellyman, D. J. (2013). Does  
142 one size fit all? An evaluation of length-weight relationships for New Zealand’s  
143 freshwater fish species. *New Zealand Journal of Marine and Freshwater Research*,  
144 47(4), 450–468. <https://doi.org/10.1080/00288330.2013.781510>
- 145 Jung, S., Hwang, S. Do, & Kim, J. (2008). Fecundity and growth-dependent mortality of  
146 Pacific anchovy (*Engraulis japonicus*) in Korean coastal waters. *Fisheries Research*,  
147 93(1–2), 39–46. <https://doi.org/10.1016/j.fishres.2008.02.004>
- 148 Kang, D., Cho, S., Lee, C., Myoung, J. G., & Na, J. (2009). Ex situ target-strength  
149 measurements of Japanese anchovy (*Engraulis japonicus*) in the coastal Northwest  
150 Pacific. *ICES Journal of Marine Science*, 66(6), 1219–1224.  
151 <https://doi.org/10.1093/icesjms/fsp042>
- 152 Oozeki, Y., Ñiquen Carranza, M., Takasuka, A., Ayón Dejo, P., Kuroda, H., Tam Malagas, J.,  
153 Okunishi, T., Vásquez Espinoza, L., Gutiérrez Aguilar, D., Okamura, H., & Guevara  
154 Carrasco, R. (2019). Synchronous multi-species alternations between the northern  
155 Humboldt and Kuroshio Current systems. *Deep-Sea Research Part II: Topical Studies in*



- 156 *Oceanography*, 159, 11–21. <https://doi.org/10.1016/j.dsr2.2018.11.018>
- 157 R Development Core Team. (2020). *R: A language and environment for statistical computing*.
- 158 R Foundation for Statistical Computing, Vienna, Austria. <https://www.r-project.org/>
- 159 Valle, M., Rosas-Puchuri, U., & Velez-Zuazo, X. (2020). Improving data deficiencies in
- 160 length-weight relationships for fish species around an artificial breakwater and adjacent
- 161 soft-bottom at the central coast of Peru. *Journal of Applied Ichthyology*, Early View.
- 162 <https://doi.org/10.1111/jai.14089>
- 163 Yukami, R., Aoki, I., & Mitani, I. (2008). Daily age of adult Japanese anchovy *Engraulis*
- 164 *japonicus* off eastern Honshu, Japan by otolith daily increment. *Fisheries Science*, 74(6),
- 165 1348–1350. <https://doi.org/10.1111/j.1444-2906.2008.01665.x>
- 166
- 167

168 Table 1. Sample sizes and ranges of body length and weight of four small pelagic fish species  
169 caught in the western North Pacific.

| Species                                                       | <i>n</i> | TL (cm) |      | FL (cm) |      | SL (cm) |      | W (g) |       |
|---------------------------------------------------------------|----------|---------|------|---------|------|---------|------|-------|-------|
|                                                               |          | Min     | Max  | Min     | Max  | Min     | Max  | Min   | Max   |
| <i>Sardinops melanostictus</i><br>(Temminck & Schlegel, 1844) | 1809     | 12.5    | 25.2 | 11.4    | 22.6 | 10.9    | 21.5 | 12.9  | 142.4 |
| <i>Engraulis japonicus</i><br>(Temminck & Schlegel, 1846)     | 664      | 4.7     | 16.2 | 4.3     | 15.4 | 4.0     | 14.4 | 0.43  | 28.6  |
| <i>Scomber japonicus</i><br>(Houttuyn, 1782)                  | 3682     | 6.3     | 46.1 | 5.9     | 43.0 | 5.3     | 39.8 | 1.6   | 874.9 |
| <i>Scomber australasicus</i><br>(Cuvier, 1832)                | 312      | 15.7    | 34.4 | 14.6    | 32.2 | 13.6    | 29.4 | 31.2  | 369.5 |

170 Abbreviations: *n*, sample size; TL, total length; FL, fork length; SL, standard length; W, total  
171 body weight.

172

173

174 Table 2. Estimated length–length relationship parameters for four small pelagic fish species in  
 175 the western North Pacific.

| Species                                                          | Equation          | $a$ (95% CI)              | $b$ (95% CI)        | $r^2$ |
|------------------------------------------------------------------|-------------------|---------------------------|---------------------|-------|
| <i>Sardinops melanostictus</i><br>(Temminck & Schlegel,<br>1844) | TL = $a + b$ (FL) | -0.241 (-0.327 to -0.156) | 1.09 (1.09 to 1.10) | 0.99  |
|                                                                  | TL = $a + b$ (SL) | 0.371 (0.295 to 0.447)    | 1.13 (1.12 to 1.13) | 0.99  |
|                                                                  | FL = $a + b$ (SL) | 0.559 (0.485 to 0.633)    | 1.03 (1.03 to 1.04) | 0.99  |
| <i>Engraulis japonicus</i><br>(Temminck & Schlegel,<br>1846)     | TL = $a + b$ (FL) | 0.121 (0.064 to 0.178)    | 1.07 (1.06 to 1.08) | 0.99  |
|                                                                  | TL = $a + b$ (SL) | 0.358 (0.307 to 0.409)    | 1.12 (1.11 to 1.13) | 0.99  |
|                                                                  | FL = $a + b$ (SL) | 0.221 (0.167 to 0.276)    | 1.05 (1.04 to 1.05) | 0.99  |
| <i>Scomber japonicus</i><br>(Houttuyn, 1782)                     | TL = $a + b$ (FL) | -0.136 (-0.177 to -0.095) | 1.07 (1.07 to 1.08) | 0.99  |
|                                                                  | TL = $a + b$ (SL) | -0.050 (-0.094 to -0.007) | 1.16 (1.16 to 1.16) | 0.99  |
|                                                                  | FL = $a + b$ (SL) | 0.081 (0.049 to 0.113)    | 1.08 (1.08 to 1.08) | 0.99  |
| <i>Scomber australasicus</i><br>(Cuvier, 1832)                   | TL = $a + b$ (FL) | -0.006 (-0.294 to 0.278)  | 1.07 (1.05 to 1.08) | 0.98  |
|                                                                  | TL = $a + b$ (SL) | 0.158 (-0.124 to 0.436)   | 1.14 (1.13 to 1.16) | 0.98  |
|                                                                  | FL = $a + b$ (SL) | 0.157 (-0.051 to 0.362)   | 1.07 (1.06 to 1.08) | 0.99  |

176 Abbreviations: TL, total length; FL, fork length; SL, standard length; CI, confidence interval;  
 177  $r^2$ , coefficient of determination.

178

179

180

181 Table 3. Estimated length–weight relationship parameters for four small pelagic fish species  
 182 in the western North Pacific.

| Species                                                          | Equation            | $a$ (95% CI)           | $b$ (95% CI)        | $r^2$ |
|------------------------------------------------------------------|---------------------|------------------------|---------------------|-------|
| <i>Sardinops melanostictus</i><br>(Temminck & Schlegel,<br>1844) | $W = a \times TL^b$ | 0.002 (0.002 to 0.003) | 3.45 (3.41 to 3.48) | 0.94  |
|                                                                  | $W = a \times FL^b$ | 0.002 (0.002 to 0.003) | 3.54 (3.50 to 3.58) | 0.94  |
|                                                                  | $W = a \times SL^b$ | 0.004 (0.004 to 0.005) | 3.4 (3.37 to 3.44)  | 0.95  |
| <i>Engraulis japonicus</i><br>(Temminck & Schlegel,<br>1846)     | $W = a \times TL^b$ | 0.004 (0.003 to 0.004) | 3.2 (3.16 to 3.24)  | 0.98  |
|                                                                  | $W = a \times FL^b$ | 0.006 (0.006 to 0.007) | 3.08 (3.04 to 3.12) | 0.97  |
|                                                                  | $W = a \times SL^b$ | 0.008 (0.007 to 0.008) | 3.10 (3.06 to 3.13) | 0.98  |
| <i>Scomber japonicus</i><br>(Houttuyn, 1782)                     | $W = a \times TL^b$ | 0.007 (0.006 to 0.007) | 3.09 (3.08 to 3.10) | 0.99  |
|                                                                  | $W = a \times FL^b$ | 0.008 (0.007 to 0.008) | 3.11 (3.10 to 3.12) | 0.99  |
|                                                                  | $W = a \times SL^b$ | 0.010 (0.010 to 0.010) | 3.10 (3.09 to 3.11) | 0.99  |
| <i>Scomber australasicus</i><br>(Cuvier, 1832)                   | $W = a \times TL^b$ | 0.006 (0.005 to 0.007) | 3.15 (3.09 to 3.21) | 0.96  |
|                                                                  | $W = a \times FL^b$ | 0.007 (0.006 to 0.008) | 3.15 (3.09 to 3.20) | 0.97  |
|                                                                  | $W = a \times SL^b$ | 0.006 (0.006 to 0.007) | 3.25 (3.20 to 3.39) | 0.98  |

183 Abbreviations: W, total body weight; TL, total length; FL, fork length; SL, standard length;  
 184 CI, confidence interval;  $r^2$ , coefficient of determination.

185

186
